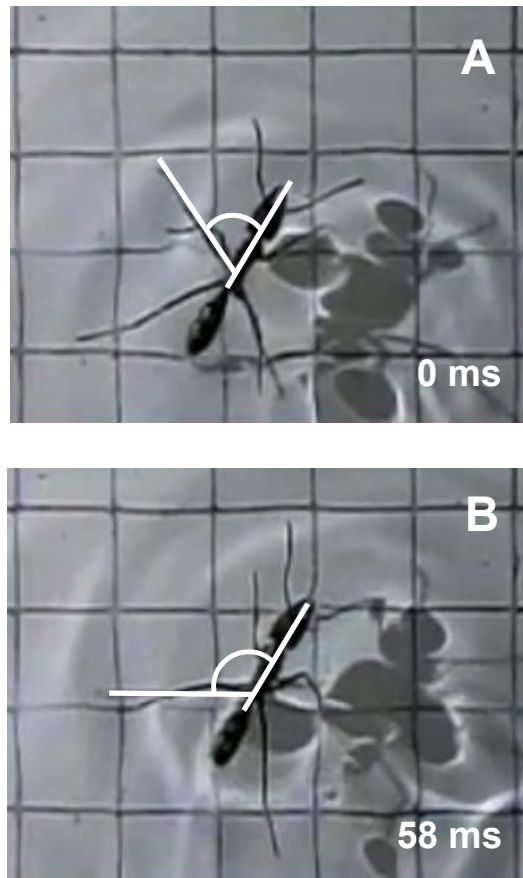

**Fig. S1.** Still frames from a high-speed ( $240 \text{ frames s}^{-1}$ ) video illustrating measurement of the left mid leg sweep amplitude in *Pachycondyla villosa*. Amplitude was determined by subtracting the angle shown in A from the angle shown in B. The background grid is  $1 \times 1 \text{ cm}$ .

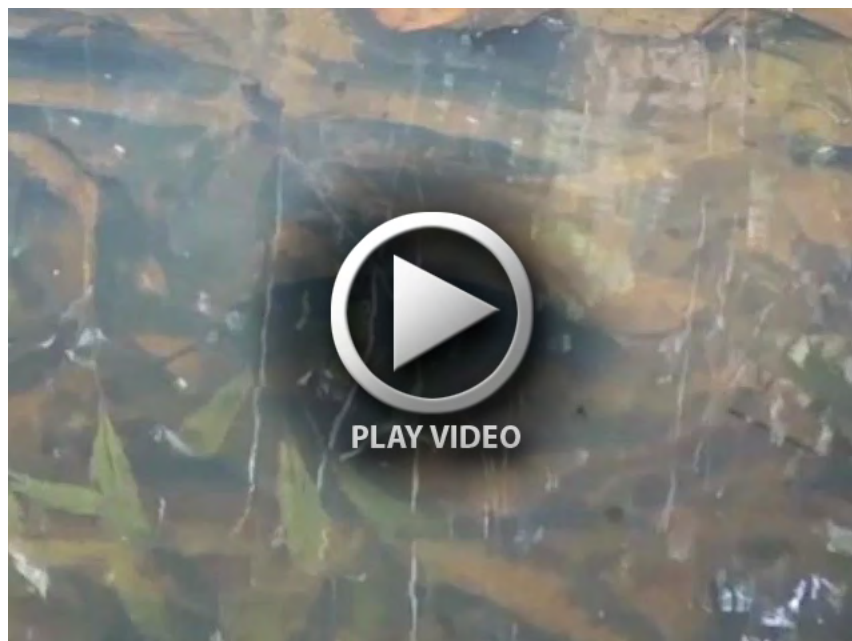

**Movie 1.** Directed swimming of a *Pachycondyla villosa* worker on the surface of a pond in Panama. The ant easily evades approaching gerrids.

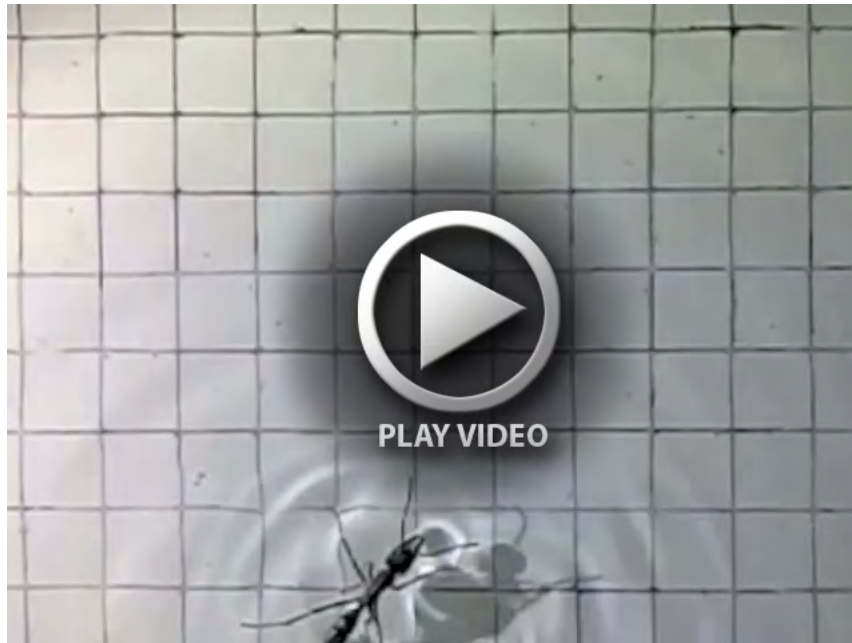

**Movie 2.** High-speed (240 frames  $s^{-1}$ ) recording of a *Pachycondyla villosa* worker swimming across the surface of a water-filled experimental pan in the laboratory.

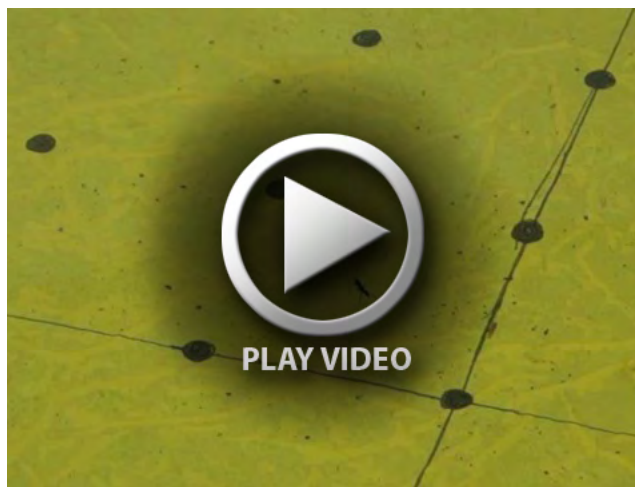

**Movie 3.** An *Odontomachus bauri* worker swimming toward the black target in an experimental pool in Panama.
